# Supplementary material
Source: publisher figshare collection journal article supplement (https://asha.figshare.com/articles/dataset/_/23152817)
Supplement: Supplementary file 1 [file 1]

**Supplemental Material S1.** States with survey respondents ( $N = 564$ ).

| State          | Number | Percentage |
|----------------|--------|------------|
| Alabama        | 3      | 0.53       |
| Alaska         | 12     | 2.13       |
| Arizona        | 25     | 4.43       |
| Arkansas       | 9      | 1.60       |
| California     | 57     | 10.11      |
| Colorado       | 18     | 3.20       |
| Connecticut    | 10     | 1.77       |
| Delaware       | 9      | 1.60       |
| Florida        | 21     | 3.72       |
| Georgia        | 8      | 1.42       |
| Hawaii         | 5      | 0.89       |
| Idaho          | 10     | 1.77       |
| Illinois       | 12     | 2.13       |
| Indiana        | 1      | 0.20       |
| Iowa           | 1      | 0.20       |
| Kansas         | 9      | 1.60       |
| Kentucky       | 3      | 0.53       |
| Louisiana      | 4      | 0.71       |
| Maine          | 3      | 0.53       |
| Maryland       | 4      | 0.71       |
| Massachusetts  | 10     | 1.77       |
| Michigan       | 8      | 1.42       |
| Minnesota      | 3      | 0.53       |
| Mississippi    | 4      | 0.71       |
| Missouri       | 3      | 0.53       |
| Montana        | 2      | 0.35       |
| Nebraska       | 3      | 0.53       |
| Nevada         | 5      | 0.89       |
| New Hampshire  | 7      | 1.24       |
| New Jersey     | 16     | 2.84       |
| New Mexico     | 5      | 0.89       |
| New York       | 27     | 4.79       |
| North Carolina | 87     | 15.43      |
| North Dakota   | 3      | 0.53       |
| Ohio           | 10     | 1.77       |
| Oklahoma       | 8      | 1.42       |
| Oregon         | 4      | 0.71       |
| Pennsylvania   | 9      | 1.60       |
| Rhode Island   | 4      | 0.71       |
| South Carolina | 1      | 0.20       |
| South Dakota   | 2      | 0.35       |
| Tennessee      | 7      | 1.24       |

|                       |     |      |
|-----------------------|-----|------|
| Texas                 | 19  | 3.37 |
| Utah                  | 2   | 0.35 |
| Vermont               | 1   | 0.20 |
| Virginia              | 42  | 7.45 |
| Washington            | 6   | 1.06 |
| Washington DC         | 4   | 0.71 |
| West Virginia         | 27  | 4.79 |
| Wisconsin             | 11  | 1.95 |
| Skipped this question | 325 |      |

---
