# Supplementary material
Source: publisher figshare collection journal article supplement (https://asha.figshare.com/articles/dataset/_/23152817)
Supplement: Supplementary file 2 [file 1]

**Supplemental Material S3.** Percentage of respondents by career stage reporting each response option for informal EBP training.

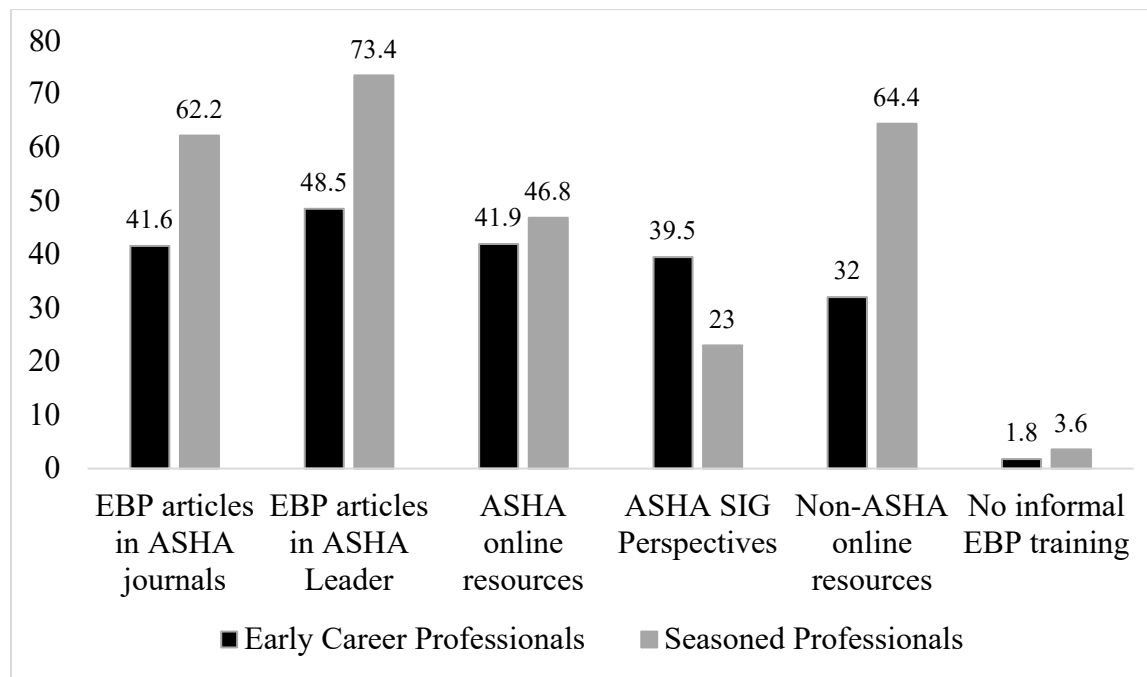

*Note.* Respondents could report multiple forms of training; thus, percentages may not total 100.
